# Supplementary material for: The Arabidopsis Thylakoid Chloride Channel AtCLCe Functions in Chloride Homeostasis and Regulation of Photosynthetic Electron Transport
Source: PubMed Central journal article supplement (PMC4746265; doi:10.3389/fpls.2016.00115), 2016-02-09
Supplement: Presentation1.pdf [file Presentation1.pdf]

# Supplementary Material

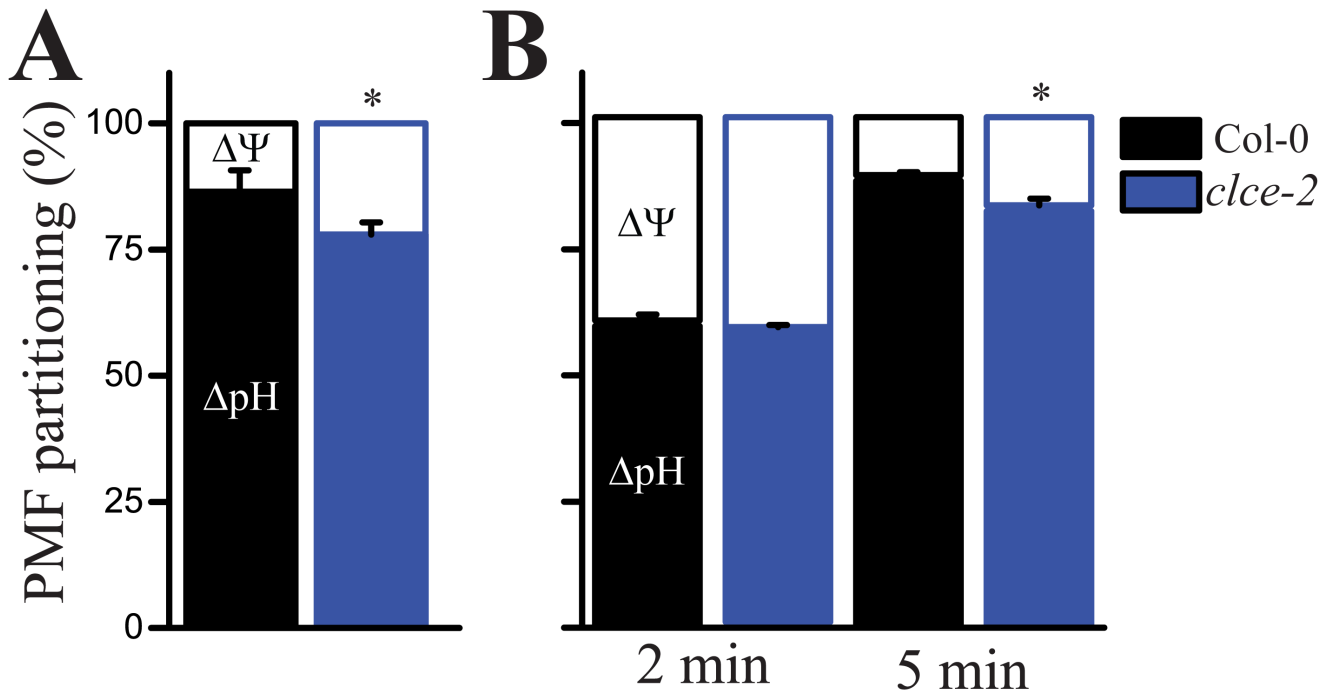

## Supplementary Figure 1. Composition of proton motive force (PMF).

(A) PMF partitioning into membrane pH gradient ( $\Delta\text{pH}$ ) and membrane potential ( $\Delta\Psi$ ) after 10 min illumination at 100  $\mu\text{mol photons m}^{-2} \text{s}^{-1}$ .

(B) PMF partitioning after 2 or 5 min illumination at 650  $\mu\text{mol photons m}^{-2} \text{s}^{-1}$ . The plotted data are means  $\pm$  SEM (n=5-6 plants). Asterisks indicate statistical differences according to ANOVA ( $P < 0.05$ ).
